# Supplementary material for: Effects of Active Video Games on Health-Related Physical Fitness and Motor Competence in Children and Adolescents With Overweight or Obesity: Systematic Review and Meta-Analysis
Source: PubMed Central journal article supplement (PMC8561411; doi:10.2196/29981), 2021-10-18
Supplement: games_v9i4e29981_app2.pdf [file games_v9i4e29981_app2.pdf]

**Table S2:** Descriptive characteristics of included non-controlled trials

| Study                      | Participants                     |             | Intervention                 | Training                                                                                          | Variables and test used                                                                                                                                                                                   | Outcomes                                                                                                                                                                                                                                                                                                                    |
|----------------------------|----------------------------------|-------------|------------------------------|---------------------------------------------------------------------------------------------------|-----------------------------------------------------------------------------------------------------------------------------------------------------------------------------------------------------------|-----------------------------------------------------------------------------------------------------------------------------------------------------------------------------------------------------------------------------------------------------------------------------------------------------------------------------|
|                            | N                                | Years       |                              |                                                                                                   |                                                                                                                                                                                                           |                                                                                                                                                                                                                                                                                                                             |
| Argarini et al., 2020 [67] | n= 17<br>male (7)<br>female (10) | 8.30 ± 1.55 | Xbox Kinect                  | Period: 4 weeks<br>Frequency: 3 sessions per week<br>Duration: 30-40 min <sup>i</sup> per session | Body weight<br><br>BMI <sup>c</sup><br><br>%BF <sup>a</sup> (Skin thickness)<br><br>MC <sup>g</sup> (catch, vertical jump and kick)                                                                       | A significant improvement in vertical jump was observed. There was also significant decline on body weight, BMI, and %BF.                                                                                                                                                                                                   |
| Huang et al., 2017 [63]    | n= 10<br>male (8)<br>female (2)  | 8.0 ± 1.8   | Nintendo Wii and Xbox Kinect | Period: 8 weeks<br>Frequency: two sessions per week<br>Duration: 60 min per session               | BMI<br><br>%BF<br><br>MF <sup>h</sup> (one-minute half sit-up test and handheld dynamometer: quadriceps in seated position and hamstrings prone position)<br><br>CRF <sup>d</sup> (20-m shuttle run test) | There were improvements in quadriceps muscle strength, muscle endurance test (sit-ups) and flexibility. The body composition showed a slight improvement during the midterm of the program, but the effect was not maintained throughout the program. There was no significant change on hamstring muscle strength and CRF. |

|                              |                                   |              |                                                                                                                                         |                                                                             |                                                                                                                                                                                                           |                                                                                                                        |
|------------------------------|-----------------------------------|--------------|-----------------------------------------------------------------------------------------------------------------------------------------|-----------------------------------------------------------------------------|-----------------------------------------------------------------------------------------------------------------------------------------------------------------------------------------------------------|------------------------------------------------------------------------------------------------------------------------|
|                              |                                   |              |                                                                                                                                         |                                                                             | Flexibility (sit and reach)                                                                                                                                                                               |                                                                                                                        |
| Duman et al., 2016 [63]      | n= 50<br>male (21)<br>female (29) | 12.16 ± 0.99 | TE <sup>J</sup> +AVG <sup>b</sup> :<br>Callisthenic and aerobic exercises for 20 min + AVG for 25 minutes                               | Period: 8 weeks<br>Frequency: 3 days per week                               | BMI<br><br>FM <sup>f</sup> (triceps skinfold thickness)<br><br>Waist circumference<br><br>CRF<br><br>MF (50-m run, squats in 120 seconds, time up and down 20 stairs and jumps over a rope in 30 seconds) | TE+AVG showed decreases in BMI, FM and waist circumference; TE+AVG showed higher CRF and MF (performance in all tests) |
| Calcaterra et al., 2013 [65] | n= 22<br>male (13)<br>female (9)  | 13.23 ± 1.76 | EXE <sup>c</sup> +AVG: a combination of circuit-based aerobics, strength and resistance exercises with interactive video game exercises | Period: 12 weeks<br>Frequency: twice a week<br>Duration: 90 min per session | BMI<br><br>Waist circumference<br><br>%BF (bioelectrical impedance)<br><br>CRF (during a submaximal                                                                                                       | BMI, waist circumference and %BF decreased significantly; CRF and MF improved significantly.                           |

|                              |                                   |            |                                                                                                                         |                                            |                            |                                             |
|------------------------------|-----------------------------------|------------|-------------------------------------------------------------------------------------------------------------------------|--------------------------------------------|----------------------------|---------------------------------------------|
|                              |                                   |            |                                                                                                                         |                                            | treadmill test)            |                                             |
|                              |                                   |            |                                                                                                                         |                                            | MF (Hand-grip dynamometry) |                                             |
| Christison et al., 2012 [66] | n= 40<br>male (26)<br>female (22) | 11.2 ± 2.2 | DDR; Exerbike XG ; Nintendo Wii; Makoto Interactive Arena; Lightspace Play Floor; Cybex Trazer; Treadwall; Xavix system | Period: 10 weeks<br>Frequency: 2h per week | BMI                        | BMI and BMI z-score decreased significantly |

<sup>a</sup>%BF: body fat percentage, <sup>b</sup>AVG: active video game, <sup>c</sup>BMI: body mass index, <sup>d</sup>CRF: cardiorespiratory fitness, <sup>e</sup>EXE: exercise, <sup>f</sup>FM: fat mass, <sup>g</sup>MC: motor competence, <sup>h</sup>MF: musculoskeletal fitness, <sup>i</sup>min: minutes, <sup>j</sup>TE: traditional exercise.
