# Supplementary material for: Effects of Active Video Games on Health-Related Physical Fitness and Motor Competence in Children and Adolescents With Overweight or Obesity: Systematic Review and Meta-Analysis
Source: PubMed Central journal article supplement (PMC8561411; doi:10.2196/29981), 2021-10-18
Supplement: games_v9i4e29981_app3.pdf [file games_v9i4e29981_app3.pdf]

**Table 1:** Quality assessment of randomized controlled trials.

| Study                        | Bias arising from the randomization process                                         | Bias due to deviations from intended interventions                                  | Bias due to missing outcome data                                                    | Bias in measurement of the outcome                                                    | Bias in selection of the reported result                                              | Overall risk of bias                                                                  |
|------------------------------|-------------------------------------------------------------------------------------|-------------------------------------------------------------------------------------|-------------------------------------------------------------------------------------|---------------------------------------------------------------------------------------|---------------------------------------------------------------------------------------|---------------------------------------------------------------------------------------|
| Irandoost et al (2020) [62]  |    |    |    |    |    |    |
| Bonney et al (2019) [61]     |    |    |    |    |    |    |
| Staiano et al (2018) [54]    |  |  |  |  |  |  |
| Staiano et al (2017) [52]    |  |  |  |  |  |  |
| Christison et al (2016) [42] |  |  |  |  |  |  |
| Foley et al (2014) [44]      |  |  |  |  |  |  |
| Trost et al (2014) [55]      |  |  |  |  |  |  |

|                             |                                                                                     |                                                                                     |                                                                                     |                                                                                       |                                                                                       |                                                                                       |
|-----------------------------|-------------------------------------------------------------------------------------|-------------------------------------------------------------------------------------|-------------------------------------------------------------------------------------|---------------------------------------------------------------------------------------|---------------------------------------------------------------------------------------|---------------------------------------------------------------------------------------|
| Staiano et al (2013) [56]   |    |    |    |    |    |    |
| Maloney et al (2012) [57]   |    |    |    |    |    |    |
| Goldfield et al (2012) [60] |    |    |    |    |    |    |
| Maddison et al (2011) [51]  |    |    |    |    |    |    |
| Maddison et al (2011) [59]  |  |  |  |  |  |  |
| Adamo et al (2010) [58]     |  |  |  |  |  |  |
