# Supplementary material for: Effects of Active Video Games on Health-Related Physical Fitness and Motor Competence in Children and Adolescents With Overweight or Obesity: Systematic Review and Meta-Analysis
Source: PubMed Central journal article supplement (PMC8561411; doi:10.2196/29981), 2021-10-18
Supplement: games_v9i4e29981_app4.pdf [file games_v9i4e29981_app4.pdf]

**Table 2:** Descriptive characteristics of included studies with overweight and obese children.

| Study                       | Participants  |               |                             | Study design     | Intervention                                                | Control                                                                                                                                | Training                                                                   | Variables and test used                                                                             | Outcomes                                                                        |
|-----------------------------|---------------|---------------|-----------------------------|------------------|-------------------------------------------------------------|----------------------------------------------------------------------------------------------------------------------------------------|----------------------------------------------------------------------------|-----------------------------------------------------------------------------------------------------|---------------------------------------------------------------------------------|
|                             | Population, N | Sex           | Age (years)                 |                  |                                                             |                                                                                                                                        |                                                                            |                                                                                                     |                                                                                 |
| Irاندoust et al (2020) [62] | 59            | Male (n=59)   | Primary school (6-11 years) | RCT <sup>a</sup> | Nintendo Wii and Xbox Kinect (n=21; mean 8.9, SD 1.2 years) | CG <sup>b</sup> 1: aquatic exercise intervention (n=18; mean 9.3, SD 1.3 years); CG 2: no intervention (n=20; mean 8.95, SD 1.2 years) | Period: 12 weeks; frequency: 3 days per week; duration: 60 min per session | Weight and BMI                                                                                      | AVG <sup>c</sup> and CG 1 observed decreased weight and BMI compared with CG 2. |
| Bonney et al.(2019) [61]    | 52            | Female (n=52) | 13-16 years                 | RCT              | Wii Fit (n=26)                                              | Task-oriented functional training (n=26)                                                                                               | Period: 14 weeks; frequency: once a week; duration:                        | CRF <sup>d</sup> (20-min shuttle run test); MF <sup>e</sup> (knee extensors, ankle plantar flexors) | Both AVG and CG demonstrated significant improvement in                         |

|                           |    |                          |                         |     |                                             |                                                 |                                                                            |                                                                                                     |                                                                                                 |
|---------------------------|----|--------------------------|-------------------------|-----|---------------------------------------------|-------------------------------------------------|----------------------------------------------------------------------------|-----------------------------------------------------------------------------------------------------|-------------------------------------------------------------------------------------------------|
|                           |    |                          |                         |     |                                             |                                                 | 45 min per session                                                         | isometric strength with a handheld dynamometer); and MC <sup>f</sup> (Movement ABC-2 <sup>g</sup> ) | CRF, MF, and MC. No between-group differences were observed.                                    |
| Staiano et al (2018) [54] | 45 | Male (54%); female (46%) | Mean 11.2, SD 0.8 years | RCT | Xbox Kinect (n=22)                          | No intervention (n=23)                          | Period: 24 weeks; frequency: 3 days per week; duration: 60 min per session | BMI; %BF <sup>h</sup> ; and FM <sup>i</sup> (DXA <sup>j</sup> )                                     | Positive effects were observed on BMI z-score and weight z-score for AVG but not on FM and %BF. |
| Staiano et al (2017) [52] | 41 | Female (n=41)            | 14-18 years             | RCT | Xbox Kinect (n=22; mean 15.3, SD 1.2 years) | No intervention (n=19; mean 16.1, SD 1.4 years) | Period: 12 weeks; frequency: 60 min per week                               | BMI; WC <sup>k</sup> ; and FM and %BF (DXA)                                                         | No effects on BMI, WC, FM, and %BF were observed.                                               |
| Christison et al          | 80 | Male (n=34);             | Mean 10.1, SD 1.3 years | RCT | Nintendo Wii, DDR <sup>l</sup> , Exerbike   | No intervention (only didactic session; n=21)   | Period: 10 weeks;                                                          | BMI; WC; and CRF (20-min shuttle run)                                                               | No effects of intervention on BMI, WC, and                                                      |

|                               |     |                                      |                               |     |                                                                                                                      |                            |                                                                                                                                                                           |                                                     |                                                                                  |
|-------------------------------|-----|--------------------------------------|-------------------------------|-----|----------------------------------------------------------------------------------------------------------------------|----------------------------|---------------------------------------------------------------------------------------------------------------------------------------------------------------------------|-----------------------------------------------------|----------------------------------------------------------------------------------|
| (2016)<br>[42]                |     | female<br>(n=46)                     |                               |     | XG, Makoto<br>interactive<br>Arena,<br>Lightspace<br>Pay floor,<br>Cybex<br>Trazer, and<br>Zavix<br>system<br>(n=59) |                            | frequency: 2<br>hours per week                                                                                                                                            |                                                     | CRF were<br>observed.                                                            |
| Foley et<br>al (2014)<br>[44] | 322 | Male<br>(n=235);<br>female<br>(n=87) | Mean<br>11.6, SD<br>1.1 years | RCT | EyeToy<br>(PlayStation;<br>n=160)                                                                                    | No intervention<br>(n=162) | Period: 12 weeks<br>and 24 weeks;<br>children were<br>encouraged to<br>meet the<br>recommendations<br>of 60 min per<br>day and to<br>substitute periods<br>of traditional | BMI; FM; and<br>%BF<br>(bioelectrical<br>impedance) | Positive effects<br>on BMI, z-score<br>BMI, and %BF<br>for AVG were<br>observed. |

|                           |    |                              |                         |     |                                                                                     |                        |                                                                    |                     |                                                                                              |
|---------------------------|----|------------------------------|-------------------------|-----|-------------------------------------------------------------------------------------|------------------------|--------------------------------------------------------------------|---------------------|----------------------------------------------------------------------------------------------|
|                           |    |                              |                         |     |                                                                                     |                        | inactive video games                                               |                     |                                                                                              |
| Trost et al (2014) [55]   | 69 | Male (n=24); female (n=41)   | Mean 10.0, SD 1.7 years | RCT | CPWMP <sup>m</sup> with AVG with Xbox Kinect (n=31)                                 | CPWMP only (n=38)      | Period: 8 weeks and 16 weeks; frequency and duration: nonreported  | BMI and BMI z-score | Groups with AVG showed higher decreases in BMI, BMI z-score, and overweight rate than CG.    |
| Staiano et al (2013) [56] | 54 | Male (44.4%); female (55.6%) | 15-19 years             | RCT | Competitive AVG with Nintendo Wii (n=19); co-operative AVG with Nintendo Wii (n=19) | No intervention (n=16) | Period: 10 weeks and 20 weeks; frequency: 30-60 min per school day | Weight              | Participants in co-operative AVG lost more weight than CG; competitive AVG also lost weight. |

|                              |    |                            |                        |         |                                             |                                                                               |                                                                            |                                                              |                                                                  |
|------------------------------|----|----------------------------|------------------------|---------|---------------------------------------------|-------------------------------------------------------------------------------|----------------------------------------------------------------------------|--------------------------------------------------------------|------------------------------------------------------------------|
| Maloney et al (2012) [57]    | 65 | Male (n=31); female (n=34) | 9-17 years             | RCT     | DDR (n=32; mean 12.9, SD 2.36 years)        | No intervention (n=33; mean 11.73, SD 2.38 years)                             | Period: 12 weeks; frequency and duration: nonreported                      | Weight and CRF (3-min step test)                             | No effects on weight and CRF were observed.                      |
| Van Biljon et al (2012) [50] | 31 | Male and female            | 9-12 years             | Non-RCT | Nintendo Wii (n=11)                         | CG1: with access to sedentary video games (n=10); CG2: no intervention (n=10) | Period: 6 weeks; frequency: 3 days per week; duration: 30 min per session  | MC (Bruininks-Oseretsky Test)                                | Improvements in MC for AVG compared with both CGs were observed. |
| Wagener et al (2012) [53]    | 40 | Male (n=31); female (n=34) | Mean 14, SD 1.66 years | Non-RCT | Dance-based exergaming (n=21)               | No intervention (n=19)                                                        | Period: 10 weeks; frequency: 3 days per week; duration: 40 min per session | BMI z-score                                                  | No changes in BMI z-score were observed.                         |
| Goldfield et al (2012) [60]  | 26 | Male (n=12); female (n=14) | 12-17 years            | RCT     | Interactive video game cycling intervention | Exercise: stationary bike music intervention (n=13);                          | Period: 10 weeks; frequency: twice per week;                               | BMI; %BF and FFM <sup>n</sup> (bioelectrical impedance); and | AVG and CG showed improvements in CRF and %BF;                   |

|                            |     |                             |                         |     |                                           |                          |                                                                                                          |                                                                   |                                                                                                                                                                                                       |
|----------------------------|-----|-----------------------------|-------------------------|-----|-------------------------------------------|--------------------------|----------------------------------------------------------------------------------------------------------|-------------------------------------------------------------------|-------------------------------------------------------------------------------------------------------------------------------------------------------------------------------------------------------|
|                            |     |                             |                         |     | (Gamebike; n=13; mean 15.1, SD 1.8 years) | mean 13.9, SD 1.4 years) | duration: 60 min per session                                                                             | CRF (submaximal aerobic fitness with a cycle ergometer)           | no group by time effects on body weight, BMI, FM, FFM, %BF, or CRF; psychological benefits of these aerobic exercise were related to improved aerobic fitness but not to changes in body composition. |
| Maddison et al (2011) [59] | 322 | Male (n=235); female (n=87) | Mean 11.6, SD 1.1 years | RCT | EyeToy (PlayStation; n=160)               | No intervention (n=162)  | Period: 12 weeks and 24 weeks; children were encouraged to meet 60 min per day and to substitute periods | BMI; %BF (bioelectrical impedance); and CRF (20-min shuttle test) | AVG positively affected %BF. This effect was most likely mediated through improved CRF.                                                                                                               |

|                            |     |                             |                         |     |                                                                             |                                                                              |                                                                                                                                                                   |                                                                       |                                                                                 |
|----------------------------|-----|-----------------------------|-------------------------|-----|-----------------------------------------------------------------------------|------------------------------------------------------------------------------|-------------------------------------------------------------------------------------------------------------------------------------------------------------------|-----------------------------------------------------------------------|---------------------------------------------------------------------------------|
|                            |     |                             |                         |     |                                                                             |                                                                              | of traditional inactive video games                                                                                                                               |                                                                       |                                                                                 |
| Maddison et al (2011) [51] | 322 | Male (n=235); female (n=87) | Mean 11.6, SD 1.1 years | RCT | EyeToy (PlayStation; n=160)                                                 | No intervention (n=162)                                                      | Period: 12 weeks and 24 weeks; children were encouraged to meet the recommendations of 60 min per day and to substitute periods of traditional inactive videogame | BMI; WC; %BF (bioelectrical impedance); and CRF (20-min shuttle test) | Positive effect on BMI, BMI z-score, FM, and %BF was observed, favoring AVG.    |
| Adamo et al (2010) [58]    | 26  | Male and female             | 12-17 years             | RCT | Interactive video game cycling intervention (n=13; mean 13.9, SD 1.4 years) | Exercise: stationary bike music intervention (n=13; mean 13.9, SD 1.4 years) | Period: 10 weeks; frequency: twice per week; duration: 60 min per session                                                                                         | BMI; %BF and FFM (bioelectrical impedance); WC; and CRF (submaximal   | AVG and CG showed improvements in CRF; no group by time effects on body weight, |

|  |  |  |  |  |                     |  |  |                                         |                                                                                                                                 |
|--|--|--|--|--|---------------------|--|--|-----------------------------------------|---------------------------------------------------------------------------------------------------------------------------------|
|  |  |  |  |  | 15.1, SD 1.8 years) |  |  | aerobic fitness with a cycle ergometer) | BMI, FM, FFM, %BF, or CRF; positive time effects were found on %BF when both AVG and CG were combined and compared at baseline. |
|--|--|--|--|--|---------------------|--|--|-----------------------------------------|---------------------------------------------------------------------------------------------------------------------------------|

<sup>a</sup>RCT: randomized controlled trial.

<sup>b</sup>CG: control group.

<sup>c</sup>AVG: active video game.

<sup>d</sup>CRF: cardiorespiratory fitness.

<sup>e</sup>MF: musculoskeletal fitness.

<sup>f</sup>MC: motor competence.

<sup>g</sup>Movement ABC-2: Movement Assessment Battery for Children-Second Edition.

<sup>h</sup>%BF: body fat percentage.

<sup>i</sup>FM: fat mass.

<sup>j</sup>DXA: dual-energy x-ray absorptiometry.

<sup>k</sup>WC: waist circumference.

<sup>l</sup>DDR: Dance Dance Revolution.

<sup>m</sup>CPWMP: Comprehensive Pediatric Weight Management Program.

<sup>n</sup>FFM: fat-free mass.
